# Supplementary material for: Dysregulation of neuron differentiation in an autistic savant with exceptional memory
Source: PubMed Central journal article supplement (PMC6836402; doi:10.1186/s13041-019-0507-7), 2019-11-07
Supplement: 13041_2019_507_MOESM3_ESM.pdf [file 13041_2019_507_MOESM3_ESM.pdf]

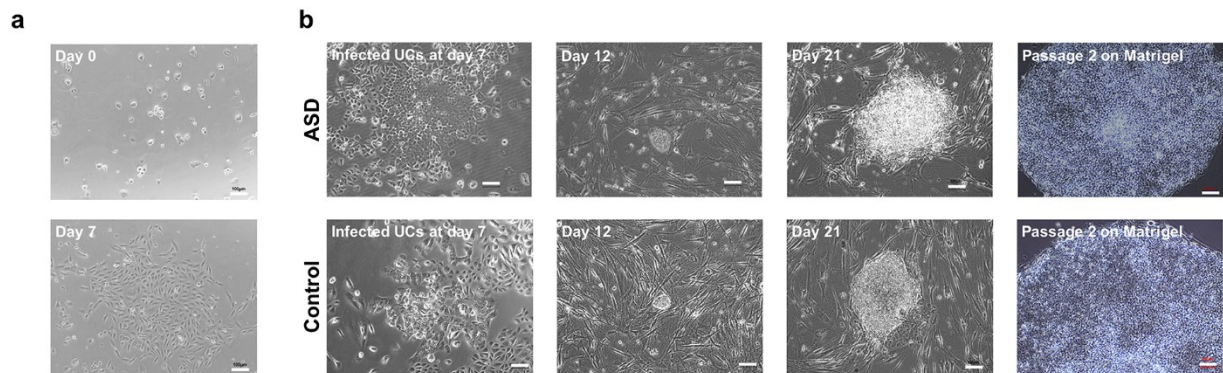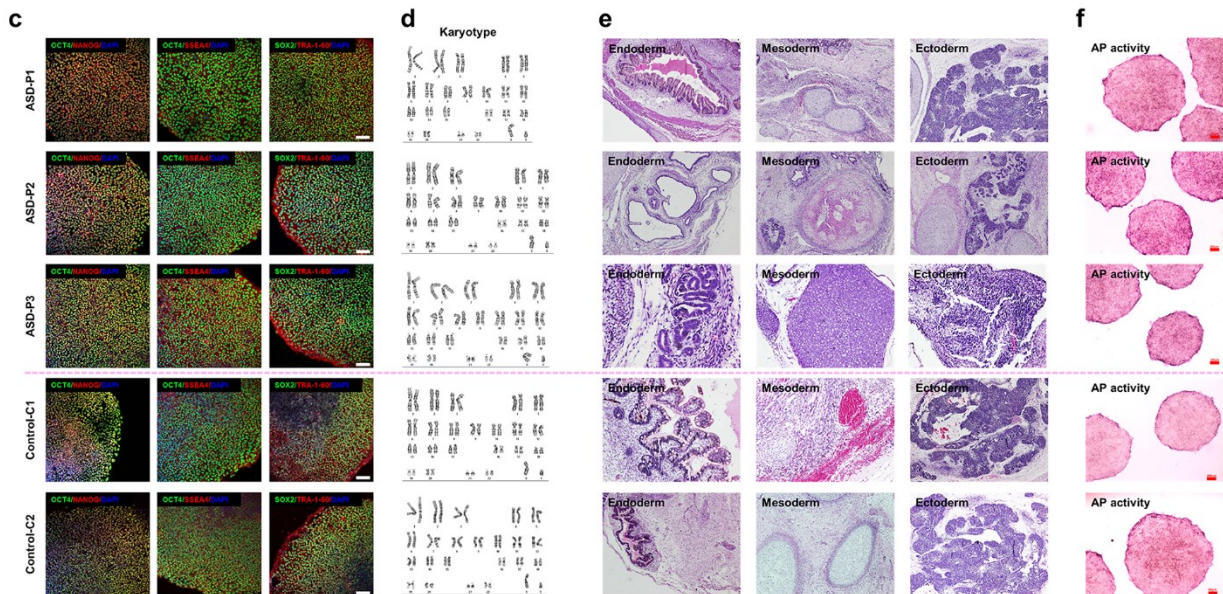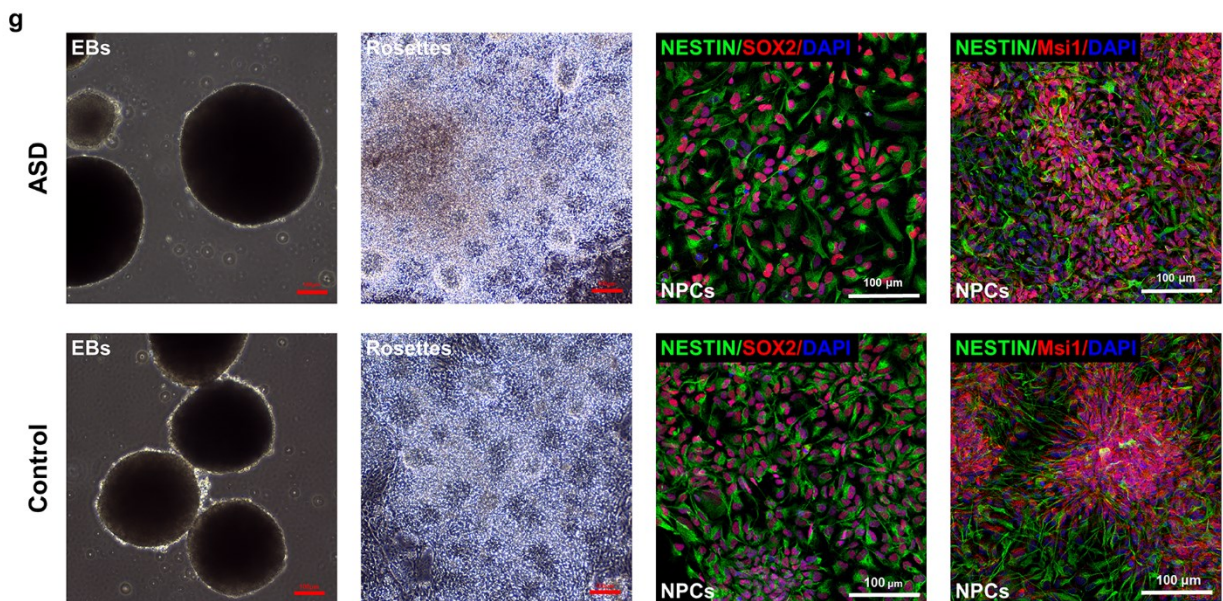

**Additional file 3. Figure S1. Sample images of UiPSCs generation and NPCs differentiation.**

**Related to Figure 1**

(a) Sample images of urinary cells at the different phases after isolation. (b) Sample images of the different phases of Sendai virus-infected urinary cells, and sample images of picked UiPSCs cultured on Matrigel. (c-f) Characterization of five UiPSC lines. (c) Sample confocal images of immunostaining of pluripotency-associated markers for five UiPSC lines. Scale bar, 100  $\mu\text{m}$ . (d) Sample images of normal karyotyping of all UiPSC lines. (e) Pluripotency of UiPSCs in vivo. Shown were sample images of cell types of three germ-layers in teratomas dissected from UiPSC-injected SCID mice. (f) Pluripotency of UiPSCs in vitro. Shown were sample images of positive staining for AP activity. Scale bar, 200  $\mu\text{m}$ . (g) Sample images of three types of cells at different phases of neural differentiation. They were embryoid bodies (EBs), neural tube-like rosettes and dahlia-like neural progenitor cells (NPCs). The markers of NPCs were nestin, SOX2 and musashi1 (Msi1) at low and high cell densities. Scale bar, 100  $\mu\text{m}$ .
