# Supplementary material for: Dysregulation of neuron differentiation in an autistic savant with exceptional memory
Source: PubMed Central journal article supplement (PMC6836402; doi:10.1186/s13041-019-0507-7), 2019-11-07
Supplement: 13041_2019_507_MOESM4_ESM.pdf [file 13041_2019_507_MOESM4_ESM.pdf]

a

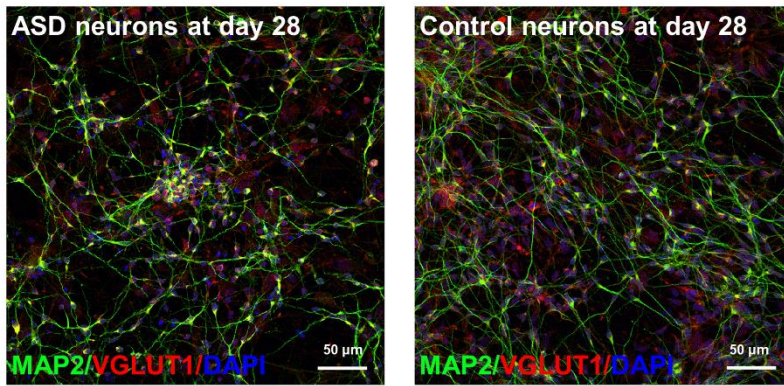

b

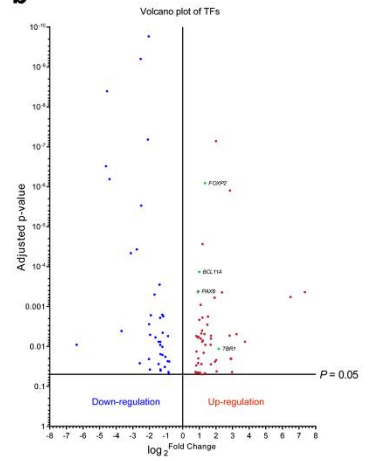

#### Additional file 4. Figure S2. Other characters of UiPSC-derived neurons.

##### Related to Figure 2

(a) Sample images of UiPSC-derived neurons on day 28. Most UiPSC-derived neurons expressed MAP2 and VGLUT1 in two groups. Scale bar, 50  $\mu$ m. (b) Volcano plots of differentially expressed TFs. The blue dots indicate downregulation, and the red dots indicate upregulation. In addition, the green dots represent major TFs involved in the network of *TBR1*.
