# Supplementary material for: Dysregulation of neuron differentiation in an autistic savant with exceptional memory
Source: PubMed Central journal article supplement (PMC6836402; doi:10.1186/s13041-019-0507-7), 2019-11-07
Supplement: 13041_2019_507_MOESM5_ESM.pdf [file 13041_2019_507_MOESM5_ESM.pdf]

Table S3 Antibody list

| Primary Antibodies                   |            |              |                            |       |                    |                  |                 |
|--------------------------------------|------------|--------------|----------------------------|-------|--------------------|------------------|-----------------|
| Marker Name                          | Host       | ICC Dilution | MW(kDa)/(Dilution)         | m/pAb | Species Reactivity | Vendor           | Catalog#        |
| Anti-SOX2                            | Rabbit     | 1/300        | 35 kD/(1/1000)             | mAb   | H                  | CST              | 3579S           |
| Anti-TRA-1-60                        | Mouse      | 1/500        | 200-400 kD/(1/1000)        | mAb   | H                  | CST              | 4746S           |
| Anti-OCT4                            | Rabbit     | 1/400        | 45 kD/(1/1000)             | pAb   | H                  | CST              | 2750S           |
| Anti-SSEA4                           | Mouse      | 1/300        | N/A                        | mAb   | H                  | CST              | 4755S           |
| Anti-NANOG                           | Mouse      | 1/1000       | 42 kD/(1/1000)             | mAb   | H                  | CST              | 4893S           |
| Anti-NESTIN                          | Rabbit     | 1/400        | 220 kD/(1/2000-1/25000)    | pAb   | H                  | Millipore        | ABD69           |
| Anti-NESTIN                          | Mouse      | 1/100        | 220-240 kD/(1/1000-1/5000) | mAb   | H                  | Millipore        | MAB5326         |
| Anti-Musashi 1                       | Rabbit     | 1/400        | 39 kD/(1/1000)             | mAb   | H, Ch, Quail       | Abcam            | ab178003        |
| Anti-PAX6                            | Mouse      | 1/1000       | 46, 48 kD/(1/500)          | mAb   | H, M, R, Ch        | Millipore        | MAB5552         |
| Anti-SOX1                            | Rabbit     | 1/200        | 40 kD/(1/200-1/1000)       | pAb   | H, M, R            | Millipore        | AB15766         |
| Anti-MAP2                            | Rabbit     | 1/200        | 75, 82, 280 kD/(1/1000)    | pAb   | H, M, R, Mk        | CST              | 4542S           |
| Anti-MAP2(2a+2b)                     | Mouse      | 1/800        | 280 kD/(1/800-1/2000)      | mAb   | H, M, R, B, ...    | SIGMA            | M2320-100UL     |
| Anti-VGLUT1                          | Mouse      | 1/1000       | 62 kD/(1/1000)             | mAb   | H, M, R            | SIGMA            | AMAB91041-100UL |
| Anti-GAD65                           | Mouse      | N/A          | 65 kD/(1/1000)             | mAb   | H, M, R            | Abcam            | ab85866         |
| Anti-GAD67                           | Mouse      | 1/400        | 67 kD/(1/500)              | mAb   | H, M, R            | Millipore        | MAB5406         |
| Anti-GABA                            | Rabbit     | 1/400        | N/A                        | pAb   | A                  | SIGMA            | A2052           |
| Anti-GABA                            | Guinea Pig | 1/500        | N/A                        | pAb   | A                  | Millipore        | AB175           |
| Anti-VGAT                            | Rabbit     | 1/100-1/1000 | 57 kD/(1/1000)             | pAb   | H, R, M, Mk        | Synaptic Systems | 131002          |
| Anti-PSD95                           | Rabbit     | 1/200        | 95 kD/(1/1000)             | mAb   | H, M, R            | CST              | 3450S           |
| Anti-PSD95                           | Mouse      | 1/200        | 95 kD/(1/500)              | mAb   | H, M, R, B         | Millipore        | MAB1598         |
| Anti-SYN1                            | Rabbit     | 1/200        | 77 kD/(1/1000)             | mAb   | H, M, R            | CST              | 5297S           |
| Anti-FOXP2                           | Rabbit     | 1/200-1/500  | 90 kD/(1/1000)             | pAb   | H                  | SIGMA            | HPA000382-100UL |
| Anti-FOXP2                           | Rabbit     | 1/500-1/8000 | ~100 kD/(1/500)            | pAb   | H, M, R            | Abcam            | ab16046         |
| Anti-TBR1                            | Rabbit     | 1/400        | N/A                        | mAb   | H, M, R            | CST              | 49661           |
| Anti-TBR1                            | Rabbit     | 1/200        | 74 kD/(1/500)              | pAb   | H, M, R            | Abcam            | ab31940         |
| Anti-TBR2                            | Rabbit     | 1/100-1/500  | 72 kD/(1-200-1/1250)       | pAb   | H, M, R            | Abcam            | ab23345         |
| Anti-BRN2(POU3F2)                    | Rabbit     | 1/3200       | 55 kD/(1/1000)             | mAb   | H, M, R            | CST              | 12137S          |
| Anti-CTIP2(BCL11B)                   | Mouse      | 1/50-1/500   | 116 kD/(1/200)             | mAb   | H, M, R            | SANTA CRUZ       | sc-365320       |
| Anti-CUX1(CUTL1)                     | Mouse      | 1/50         | ~75 kD/(1/200)             | mAb   | H, M               | Abcam            | ab54583         |
| Anti-p-NMDA Receptor 2A(GluN2A)      | Rabbit     | N/A          | 180 kD/(1/1000)            | pAb   | R, (H, M)          | CST              | 4206S           |
| Anti-NMDAR2A                         | Rabbit     | N/A          | 165 kD/(1/1000)            | mAb   | H, M, R            | Abcam            | ab124913        |
| Anti-p-NMDA Receptor 2B(GluN2B)      | Rabbit     | N/A          | 190 kD/(1/1000)            | pAb   | M, R, (H)          | CST              | 5355S           |
| Anti-NMDAR2B                         | Rabbit     | 1/100        | 166 kD/(1/500)             | pAb   | H, M, R, Ch        | Abcam            | ab65783         |
| Anti-beta-Actin                      | Rabbit     | N/A          | 45 kD/(1/1000)             | pAb   | H,M,R,Mk...        | CST              | 4967S           |
| Anti-GAPDH                           | Rabbit     | N/A          | 37 kD/(1/1000)             | mAb   | H,M,R,Mk           | CST              | 8884S           |
| Secondary Antibodies                 |            |              |                            |       |                    |                  |                 |
| Marker Name                          | Host       | ICC Dilution | WB Dilution                | m/pAb | Species Reactivity | Vendor           | Catalog#        |
| Anti-Mouse IgG, HRP                  | Goat       | N/A          | 1/5000                     | pAb   | Mouse              | Invitrogen       | A16006          |
| Anti-Rabbit IgG, HRP                 | Goat       | N/A          | 1/5000                     | pAb   | Rabbit             | Invitrogen       | A16104          |
| Anti-Mouse IgG, Alexa Fluor 594      | Goat       | 1/1000       | N/A                        | pAb   | Mouse              | Invitrogen       | A11005          |
| Anti-Rabbit IgG, Alexa Fluor 594     | Goat       | 1/1000       | N/A                        | pAb   | Rabbit             | Invitrogen       | A11012          |
| Anti-Mouse IgG, Alexa Fluor 488      | Goat       | 1/1000       | N/A                        | pAb   | Mouse              | Invitrogen       | A11001          |
| Anti-Rabbit IgG, Alexa Fluor 488     | Goat       | 1/1000       | N/A                        | pAb   | Rabbit             | Invitrogen       | A11034          |
| Anti-Guinea Pig IgG, Alexa Fluor 594 | Goat       | 1/1000       | N/A                        | pAb   | Guinea Pig         | Invitrogen       | A11076          |
