# Supplementary material for: Dysregulation of neuron differentiation in an autistic savant with exceptional memory
Source: PubMed Central journal article supplement (PMC6836402; doi:10.1186/s13041-019-0507-7), 2019-11-07
Supplement: 13041_2019_507_MOESM6_ESM.pdf [file 13041_2019_507_MOESM6_ESM.pdf]

**Table S4. Expression of marker genes of glutamatergic neurons and GABAergic neurons**

| <b>Gene name</b> | <b>ASD</b> | <b>Control</b> | <b>log<sub>2</sub><sup>Fold Change</sup></b> | <b><i>p</i> -value</b> | <b>Adjusted <i>p</i> -value</b> |
|------------------|------------|----------------|----------------------------------------------|------------------------|---------------------------------|
| <i>SLC17A7</i>   | 23.781     | 16.297         | 0.543                                        | 0.469                  | 0.938                           |
| <i>CAMK2A</i>    | 10.514     | 3.688          | 1.508                                        | 0.142                  | 1.000                           |
| <i>CAMK2B</i>    | 59.205     | 67.040         | -0.177                                       | 0.670                  | 0.968                           |
| <i>GAD1</i>      | 153.019    | 201.184        | -0.394                                       | 0.265                  | 0.832                           |
| <i>GAD2</i>      | 6.015      | 22.164         | -1.883                                       | 0.029                  | 0.317                           |
| <i>SLC32A1</i>   | 1726.386   | 2596.795       | -0.589                                       | 0.300                  | 0.861                           |
